# Supplementary material
Source: publisher figshare collection journal article supplement (https://geolsoc.figshare.com/ndownloader/files/22643033)
Supplement: Supplementary file 1 [file 22643033]

## Sheet: Sr-Nd-Pb
Table S3- Bulk rock Sr-Nd-Pb isotopic composition of the Paleogene rocks from oceanic tract of NW Iran.
Sample	Rock type	Rb	Sr	87Sr/86Sr	87Rb/86Sr	(87Sr/86Sr)t	Sm	Nd	143Nd/144Nd	147Sm/144Nd	(143Nd/144Nd)t	Epsilon Nd	Th	U	Pb	206Pb/204Pb	207Pb204Pb	208Pb/204Pb
NW Kamyaran
KN14-25	Pillow lava	2.6	277.9	0.704655	0.0270609	0.70464	2.78	9.6	0.513041	0.174349	0.512995	7.9784	0.8	0.3	0.8	18.2821	15.5171	38.2638
KN14-26	Pillow lava	3.9	214	0.704503	0.052711	0.704473	3.16	11.2	0.513037	0.16987	0.512992	7.91367	0.8	0.2	0.7	18.3083	15.5265	38.3107
KN14-23	Pillow lava	5.1	282.7	0.7036	0.0521743	0.70357	2.97	9.5	0.513041	0.188226	0.512992	7.9025	0.6	0.2	2.5	18.3691	15.5276	38.3117
KN14-24	Pillow lava	4.3	206.3	0.703179	0.0602787	0.703144	3.08	10.7	0.513088	0.173306	0.513043	8.90243	0.7	0.5	2.4	18.208	15.4964	38.0886
KN14-2	Granitic dike	3.6	308.4	0.70598	0.0337677	0.705961	9.04	38.7	0.512955	0.140638	0.512918	6.47186	20	4.2	0.8	19.4561	15.6393	40.768
KN14-3	Granitic dike	3.9	197.3	0.70625	0.0571824	0.706217	5.74	22.4	0.51296	0.15428	0.512919	6.491	12.1	2.6	0.9	19.4535	15.6606	40.3001
KN14-14	Gabbro	0.3	235	0.702891	0.00369178	0.702888	1.81	6	0.513056	0.181624	0.513009	8.24113	0.4	<0.1	0.5	18.2077	15.5436	38.1436
KN14-6	Gabbro	21.2	189.7	0.704463	0.323234	0.70428	6.19	21.6	0.513017	0.172538	0.512972	7.51278	2.5	0.9	0.9	18.7499	15.5685	38.9667
KN14-7	Gabbro	19	223.9	0.704842	0.245451	0.704702	1.49	4.3	0.513083	0.208624	0.513028	8.61486	0.2	<0.1	1.8	18.441	15.5648	38.3302
KN14-5	Gabbro	7.9	146	0.703356	0.156486	0.703267	2.97	9.3	0.51308	0.192274	0.51303	8.65013	0.8	0.3	1.7	18.5625	15.6208	38.6744
SE Kamyaran
KH14-26	Massive lava	69.0252	372.814	0.706958	0.535636	0.706653	6.26745	22.8002	0.512893	0.1655	0.51285	5.13697	4.56941	1.33261	15.8977
KH14-34	Massive lava	91.04	243	0.70636	1.08382	0.705745	9.44	38.7	0.512866	0.146861	0.512828	4.70496	9.434	2.871	4.06
KH14-66	Massive lava	10.78	198	0.703815	0.157462	0.703725	5.17	17.21	0.512985	0.180866	0.512938	6.85692	2.74	0.58	2.07
KH14-36	Massive lava	98.8971	312.638	0.706321	0.915103	0.705801	5.45673	21.4406	0.512882	0.153229	0.512842	4.98363	4.68409	1.34245	8.47	18.7839	15.6259	38.9218
KH14-37	Andesitic dike	3.75	310	0.707715	0.0349991	0.707695	11.8	49.7	0.512907	0.142946	0.512869	5.51644	6.165	4.82	1.98	18.5444	15.6035	38.5799
KH14-29	Andesitic dike	19.21	380	0.708105	0.146267	0.708022	6.41	37.56	0.512369	0.102749	0.512342	-4.76826	12.77	2.25	9.17	18.863	15.6294	39.1961
KH14-31	Andesitic dike	5.77119	402.595	0.70721	0.0414727	0.707187	6.99276	22.7962	0.512744	0.184686	0.512696	2.12948	10.292	3.18377	13.418	18.6985	15.6244	38.797
KH14-35	Andesitic dike	8.43	208	0.708493	0.117269	0.708426	4.87	18.56	0.512561	0.157978	0.512519	-1.31172	4.4	1.63	5.32	18.6815	15.6244	38.7052
KH14-27	Dacitic dike	89.46	499	0.708517	0.51874	0.708222	5.76	28.69	0.512352	0.120876	0.51232	-5.19244	11.98	2.46	3.54	18.8093	15.631	38.9691
KH14-38	Dacitic dike	115	346	0.709201	0.961772	0.708654	5.44	26.4	0.512346	0.124063	0.512314	-5.31909	10.13	2.35	7.58	18.718	15.63	38.819
